# Supplementary material for: Aquatic Ecosystems of the Anthropocene: Limnology and Microbial Ecology of Mine Pit Lakes
Source: MDPI journal article supplement (doi:10.3390/microorganisms9061207), 2021-06-03
Supplement: s1 [file s1]

Supplementary Table 1. Results of water chemistry analyses collected from Australian mine pit lakes (1/2) in the Bowen Basin, QLD (Bowen Lake 1; BL1, Bowen Lake 2; BL2) and Hunter Valley NSW (Hunter Lake 1; HL1, Hunter Lake 2; HL2) in 2019. ‘Habitat’ was bottom (bot) or top of lake waters. Data in italics were below the reportable limit but above zero and thus were assigned a number equal to half the detection limit [38].

|      |         |      | Limit: | <0.5               | <0.5               | <0.05              | <0.05              | <0.01              | <0.02              | <0.05              | <0.25              | <0.25              | <0.01              | <0.05              | <0.01              | <0.02              | <0.02              | <0.5               | <0.5               | <0.5               | <0.5               | <0.5               | <0.5               |
|------|---------|------|--------|--------------------|--------------------|--------------------|--------------------|--------------------|--------------------|--------------------|--------------------|--------------------|--------------------|--------------------|--------------------|--------------------|--------------------|--------------------|--------------------|--------------------|--------------------|--------------------|--------------------|
|      |         |      | Units: | µg L <sup>-1</sup> | mg L <sup>-1</sup> | mg L <sup>-1</sup> | mg L <sup>-1</sup> | mg L <sup>-1</sup> |
| Lake | Habitat | Date | B      | Al                 | Cr                 | Mn                 | Fe                 | Co                 | Ni                 | Cu                 | Zn                 | As                 | Se                 | Cd                 | Pb                 | U                  | Ba                 | Sr                 | Ca                 | K                  | Mg                 | Na                 | Cl-                |
| BL1  | Bot     | Feb  | 346.6  | 41.1               | <i>0.025</i>       | 0.29               | <i>0.005</i>       | <i>0.01</i>        | 1.75               | 2.52               | <i>0.125</i>       | 0.69               | 10.7               | <i>0.005</i>       | <i>0.01</i>        | 2.21               | 61.9               | 4793.7             | 26.0               | 12.3               | 104.6              | 1761.3             | 1575.3             |
|      |         | May  | 136.4  | 30.8               | <i>0.025</i>       | 0.79               | 3.02               | <i>0.01</i>        | 0.90               | 2.45               | 16.3               | <i>0.005</i>       | 5.17               | <i>0.005</i>       | <i>0.01</i>        | 0.68               | 44.3               | 3050.1             | 26.8               | 6.35               | 59.4               | 1069.9             | 1627.9             |
|      |         | Aug  | 209.0  | 43.2               | <i>0.025</i>       | 0.96               | 4.20               | <i>0.01</i>        | 1.62               | 2.25               | <i>0.125</i>       | 0.03               | 5.11               | <i>0.005</i>       | <i>0.01</i>        | 1.34               | 49.6               | 4250.5             | 42.9               | 9.17               | 85.5               | 1353.1             | 2711.9             |
|      | Top     | Feb  | 171.9  | 42.0               | <i>0.025</i>       | <i>0.025</i>       | <i>0.005</i>       | <i>0.01</i>        | 0.94               | 0.97               | <i>0.125</i>       | <i>0.005</i>       | 5.55               | <i>0.005</i>       | <i>0.01</i>        | 0.65               | 47.3               | 3189.5             | 22.7               | 5.46               | 56.8               | 983.3              | 1386.7             |
|      |         | May  | 204.1  | 33.3               | <i>0.025</i>       | 2.10               | 1.54               | <i>0.01</i>        | 1.10               | 1.05               | <i>0.125</i>       | 0.12               | 5.94               | <i>0.005</i>       | <i>0.01</i>        | 1.26               | 49.9               | 3764.8             | 29.3               | 8.50               | 80.4               | 1267.2             | 1065.2             |
|      |         | Aug  | 257.7  | 35.0               | <i>0.025</i>       | 2.15               | 13.9               | <i>0.01</i>        | 1.54               | 2.46               | <i>0.125</i>       | 0.22               | 7.08               | <i>0.005</i>       | <i>0.01</i>        | 2.40               | 64.6               | 5552.8             | 41.6               | 11.5               | 104.3              | 1629.1             | 1621.9             |
| BL2  | Bot     | Feb  | 200.5  | 36.1               | <i>0.025</i>       | 3.96               | 1.00               | <i>0.01</i>        | 1.55               | 2.20               | <i>0.125</i>       | 0.78               | 4.71               | <i>0.005</i>       | <i>0.01</i>        | 1.50               | 76.6               | 1067.8             | 20.7               | 6.82               | 49.6               | 620.0              | 495.6              |
|      |         | May  | 116.8  | 28.6               | <i>0.025</i>       | 1.23               | 2.48               | <i>0.01</i>        | 0.96               | 1.24               | <i>0.125</i>       | 0.30               | 3.64               | <i>0.005</i>       | <i>0.01</i>        | 0.85               | 52.6               | 675.2              | 17.7               | 4.46               | 30.5               | 463.4              | 291.3              |
|      |         | Aug  | 106.7  | 20.2               | <i>0.025</i>       | 1.00               | 13.6               | <i>0.01</i>        | 0.44               | 1.18               | <i>0.125</i>       | <i>0.005</i>       | 2.39               | <i>0.005</i>       | <i>0.01</i>        | 0.73               | 59.9               | 760.6              | 19.9               | 3.56               | 31.2               | 464.9              | 690.4              |
|      | Top     | Feb  | 167.4  | 34.5               | <i>0.025</i>       | 0.28               | 4.05               | <i>0.01</i>        | 0.70               | 1.60               | <i>0.125</i>       | 0.50               | 3.75               | <i>0.005</i>       | <i>0.01</i>        | 0.98               | 69.0               | 890.6              | 17.3               | 4.12               | 35.2               | 500.7              | 301.6              |
|      |         | May  | 158.2  | 33.7               | <i>0.025</i>       | 0.38               | 4.68               | <i>0.01</i>        | 0.90               | 1.78               | <i>0.125</i>       | 0.47               | 4.00               | <i>0.005</i>       | <i>0.01</i>        | 1.35               | 64.6               | 822.1              | 20.4               | 5.20               | 39.4               | 545.8              | 628.8              |
|      |         | Aug  | 155.9  | 24.7               | <i>0.025</i>       | 0.08               | 1.07               | <i>0.01</i>        | 0.74               | 1.86               | <i>0.125</i>       | 0.34               | 3.64               | <i>0.005</i>       | <i>0.01</i>        | 1.56               | 67.6               | 948.1              | 22.5               | 5.47               | 43.3               | 620.6              | 359.6              |
| HL2  | Bot     | Feb  | 519.7  | 74.6               | <i>0.025</i>       | 26.3               | 16.5               | <i>0.01</i>        | 1.39               | 2.55               | <i>0.125</i>       | 0.27               | <i>0.025</i>       | <i>0.005</i>       | <i>0.01</i>        | 5.54               | 14.6               | 1879.4             | 51.2               | 25.4               | 291.3              | 1017.8             | 450.1              |
|      |         | May  | 454.4  | 40.3               | <i>0.025</i>       | 38.0               | 31.2               | <i>0.01</i>        | 2.31               | 2.31               | <i>0.125</i>       | 0.19               | <i>0.025</i>       | <i>0.005</i>       | <i>0.01</i>        | 8.55               | 13.5               | 3458.2             | 113.9              | 29.6               | 304.5              | 1019.5             | 188.2              |
|      |         | Aug  | 227.3  | 17.8               | <i>0.025</i>       | 57.2               | 6.47               | <i>0.01</i>        | 1.58               | 0.57               | <i>0.125</i>       | <i>0.005</i>       | <i>0.025</i>       | <i>0.005</i>       | <i>0.01</i>        | 5.36               | 7.32               | 2644.4             | 105.9              | 15.7               | 184.5              | 823.8              | 458.4              |
|      | Top     | Feb  | 240.9  | 47.8               | <i>0.025</i>       | 10.9               | 18.2               | <i>0.01</i>        | 1.42               | 2.47               | <i>0.125</i>       | <i>0.005</i>       | <i>0.025</i>       | <i>0.005</i>       | <i>0.01</i>        | 1.89               | 7.00               | 1153.9             | 25.2               | 12.3               | 155.5              | 677.9              | 457.5              |
|      |         | May  | 449.0  | 30.1               | <i>0.025</i>       | 43.7               | 18.9               | <i>0.01</i>        | 1.93               | 1.26               | <i>0.125</i>       | 0.19               | <i>0.025</i>       | <i>0.005</i>       | <i>0.01</i>        | 8.10               | 13.1               | 3731.4             | 122.5              | 29.2               | 304.5              | 1059.7             | 293.2              |
|      |         | Aug  | 356.0  | 23.3               | <i>0.025</i>       | 75.4               | 8.43               | <i>0.01</i>        | 2.37               | 1.01               | <i>0.125</i>       | <i>0.005</i>       | <i>0.025</i>       | <i>0.005</i>       | <i>0.01</i>        | 8.62               | 8.21               | 3308.1             | 135.2              | 25.6               | 286.1              | 990.3              | 423.7              |
| HL1  | Bot     | Feb  | 73.7   | 55.3               | <i>0.025</i>       | 868.8              | 23.2               | 2.91               | 39.2               | 11.4               | 9.72               | <i>0.005</i>       | 0.41               | <i>0.005</i>       | <i>0.01</i>        | <i>0.01</i>        | 40.6               | 898.8              | 132.1              | 51.91              | 111.91             | 317.7              | 74.3               |
|      |         | May  | 42.0   | 40.1               | <i>0.025</i>       | 222.0              | 25.3               | 1.88               | 37.6               | 1.62               | 2.17               | <i>0.005</i>       | <i>0.025</i>       | <i>0.005</i>       | <i>0.01</i>        | <i>0.01</i>        | 30.8               | 832.9              | 151.6              | 44.5               | 96.2               | 266.6              | 171.2              |
|      |         | Aug  | 29.2   | 18.9               | <i>0.025</i>       | 497.1              | 6.59               | 3.31               | 33.8               | 0.93               | 1.70               | <i>0.005</i>       | <i>0.025</i>       | <i>0.005</i>       | <i>0.01</i>        | <i>0.01</i>        | 33.0               | 772.6              | 193.4              | 43.4               | 93.1               | 260.8              | 182.4              |
|      | Top     | Feb  | 58.5   | 66.5               | 3.14               | 686.7              | 64.2               | 4.87               | 33.6               | 28.1               | 10.3               | 2.61               | 3.49               | 1.79               | 2.29               | 2.55               | 31.0               | 766.4              | 137.6              | 41.3               | 89.9               | 245.3              | 91.1               |
|      |         | May  | 45.7   | 30.1               | <i>0.025</i>       | 140.0              | 16.8               | 1.60               | 44.9               | 1.53               | <i>0.125</i>       | <i>0.005</i>       | <i>0.025</i>       | <i>0.005</i>       | <i>0.01</i>        | <i>0.01</i>        | 34.6               | 878.7              | 162.1              | 49.8               | 105.3              | 345.2              | 108.6              |
|      |         | Aug  | 44.3   | 22.6               | <i>0.025</i>       | 808.1              | 7.21               | 6.31               | 55.4               | 0.58               | 3.71               | <i>0.005</i>       | <i>0.025</i>       | <i>0.005</i>       | <i>0.01</i>        | <i>0.01</i>        | 41.7               | 893.6              | 204.3              | 61.9               | 130.0              | 381.50             | 183.2              |

Supplementary Table 2. Results of water chemistry analyses collected from Australian mine pit lakes (2/2) in the Bowen Basin, QLD (Bowen Lake 1; BL1, Bowen Lake 2; BL2) and Hunter Valley NSW (Hunter Lake 1; HL1, Hunter Lake 2; HL2) in 2019. ‘Habitat’ was bottom (bot) or top of lake waters. Data in italics were below the reportable limit but above zero and thus were assigned a number equal to half the detection limit [38].

| Lake | Habitat | Limit: | < 3                  | < 2                  | < 50                 | < 2                  | < 0.5                         | < 0.5              |
|------|---------|--------|----------------------|----------------------|----------------------|----------------------|-------------------------------|--------------------|
|      |         | Units  | $\mu\text{g L}^{-1}$ | $\mu\text{g L}^{-1}$ | $\mu\text{g L}^{-1}$ | $\mu\text{g L}^{-1}$ | $\text{mg L}^{-1}$            | $\text{mg L}^{-1}$ |
|      |         | Date   | NH <sub>4</sub>      | NO <sub>x</sub>      | TN                   | FRP                  | SO <sub>4</sub> <sup>2-</sup> | DOC                |
| BL1  | Bot     | Feb    | 1.5                  | 1800.0               | 1860.0               | <i>1.0</i>           | 488.1                         | 6.02               |
|      |         | May    | 16.3                 | 1520.0               | 1680.0               | <i>1.0</i>           | 454.2                         | 55.3               |
|      |         | Aug    | <i>1.5</i>           | 1590.0               | 1710.0               | <i>1.0</i>           | 675.0                         | 174.9              |
|      | Top     | Feb    | <i>1.5</i>           | 1720.0               | 1730.0               | 3.53                 | 293.6                         | 2.52               |
|      |         | May    | <i>1.5</i>           | 726.5                | 1900.0               | <i>1.0</i>           | 431.0                         | 28.17              |
|      |         | Aug    | <i>1.5</i>           | 1320.0               | 1390.0               | <i>1.0</i>           | 454.1                         | 8.234              |
| BL2  | Bot     | Feb    | 13.1                 | <i>1.0</i>           | 148.0                | <i>1.0</i>           | 108.9                         | 2.67               |
|      |         | May    | <i>1.5</i>           | 2.43                 | 109.0                | <i>1.0</i>           | 79.5                          | 4.52               |
|      |         | Aug    | 40.2                 | 12.9                 | 342.0                | <i>1.0</i>           | 140.7                         | 41.9               |
|      | Top     | Feb    | <i>1.5</i>           | <i>1.0</i>           | 109.4                | 4.06                 | 70.3                          | 2.62               |
|      |         | May    | <i>1.5</i>           | 4.55                 | 96.9                 | <i>1.0</i>           | 129.9                         | 2.95               |
|      |         | Aug    | <i>1.5</i>           | <i>1.0</i>           | 199.0                | <i>1.0</i>           | 82.1                          | 3.17               |
| HL2  | Bot     | Feb    | <i>1.5</i>           | 3.92                 | 249.0                | 6.57                 | 1356.3                        | 9.47               |
|      |         | May    | 216.0                | 4.2                  | 323.0                | 2.41                 | 2049.7                        | 38.0               |
|      |         | Aug    | 187.0                | 3.74                 | 336.0                | <i>1.0</i>           | 1996.0                        | 7.17               |
|      | Top     | Feb    | 9.16                 | <i>1.0</i>           | 1010.0               | 5.57                 | 1457.8                        | 22.0               |
|      |         | May    | 202.0                | 3.16                 | 400.0                | 2.77                 | 1990.1                        | 7.85               |
|      |         | Aug    | 196.0                | 3.0                  | 330.0                | <i>1.0</i>           | 2034.3                        | 7.08               |
| HL1  | Bot     | Feb    | <i>1.5</i>           | 10.6                 | 280.0                | 2.35                 | 629.8                         | 4.32               |
|      |         | May    | 27.5                 | <i>1.0</i>           | 182.0                | <i>1.0</i>           | 1017.8                        | 2.84               |
|      |         | Aug    | 23.1                 | 29.0                 | 107.0                | <i>1.0</i>           | 1056.0                        | 2.72               |
|      | Top     | Feb    | <i>1.5</i>           | 20.2                 | 163.0                | 2.06                 | 626.2                         | 4.91               |
|      |         | May    | <i>1.5</i>           | <i>1.0</i>           | 133.0                | 3.92                 | 922.6                         | 2.07               |
|      |         | Aug    | 21.1                 | 32.5                 | 187.0                | <i>1.0</i>           | 1030.8                        | 2.42               |

Supplementary Table 3. Heat map of overall most abundant (> 1%) pelagic microbes collected from mine pit lakes in Australia in 2019. (Overall percent abundance in parentheses shown after taxa name). Taxa were numbered from first to fourteenth most relatively abundant across all lakes (BL1, BL2, HL1, HL2), habitats (Top, Bottom) and times (February, May, August). Per sample relative abundances are ranges (n = 3 unless otherwise specified in methods) and colour was consistently assigned based on sample with highest relative abundance.

| Phylum; D_4__Family; D_5__Genus; D_6__Species                           | BL1_Top_Feb | BL1_Bottom_Feb | BL1_Top_May | BL1_Bottom_May | BL1_Top_Aug | BL1_Bot_Aug | BL2_Top_Feb | BL2_Bottom_Feb | BL2_Top_May | BL2_Bottom_May | BL2_Top_August | BL2_Bottom_August |
|-------------------------------------------------------------------------|-------------|----------------|-------------|----------------|-------------|-------------|-------------|----------------|-------------|----------------|----------------|-------------------|
| 1. Firmicutes; D_5__Exiguobacterium;__ (5.7 %)                          | <0.01       | 0              | <0.01-0.06  | <0.01-0.32     | 0.04-0.56   | 0.04-0.24   | 0           | 0              | 0.37-0.57   | 0.31-0.59      | 0.03-0.33      | <0.01-0.16        |
| 2. Actinobacteria;D_5__CL500-29 marine group;__ (5.1 %)                 | <0.01       | <0.01          | <0.01       | <0.01          | 0           | <0.01       | <0.01       | <0.01          | <0.01-0.02  | <0.01          | 0.10-0.22      | 0.11-0.16         |
| 3 Cyanobacteria;D_5__Cyanobium PCC-6307;__ (4.3 %)                      | 0.01-0.16   | 0.01-0.17      | 0.01-0.15   | <0.01-0.03     | <0.01       | <0.01       | 0.01-0.16   | 0.05-0.11      | <0.01-0.03  | 0.02           | 0.10-0.22      | 0.10-0.12         |
| 4. Firmicutes;D_5__Planococcus;__ (4.2%)                                | 0           | 0              | 0-0.03      | 0-0.27         | 0.03-0.91   | 0.04-0.60   | 0           | 0              | 0.16-0.41   | 0.08-0.22      | <0.01-0.10     | <0.01-0.03        |
| 5. Actinobacteria;D_4__Microbacteriaceae;__;__ (3.2 %)                  | 0.03-0.04   | 0.04-0.05      | 0.02-0.10   | <0.01-0.03     | <0.01       | <0.01-0.03  | 0.03-0.04   | 0.04           | <0.01       | <0.01          | 0.06-0.08      | 0.04-0.06         |
| 6. Actinobacteria;D_5__Candidatus Aquiluna;__ (2.6 %)                   | <0.01       | <0.01          | <0.01       | <0.01          | 0           | <0.01       | <0.01       | <0.01          | <0.01       | <0.01          | <0.01          | <0.01             |
| 7. Firmicutes;D_5__Bacillus;D_6__Bacillus horikoshii (2.4 %)            | 0           | 0              | 0-0.42      | 0-0.15         | <0.01-0.18  | 0.03-0.48   | 0           | 0              | 0           | <0.01          | <0.01-0.24     | 0.15-0.28         |
| 8. Actinobacteria;D_5__CL500-29 marine group;D_6__uncult. bact. (2.3 %) | 0-0.41      | 0.02-0.22      | 0.05-0.09   | 0.02-0.05      | <0.01       | <0.01       | 0.14-0.16   | 0.11-0.19      | <0.01       | <0.01          | <0.01          | <0.01-0.02        |
| 9. Actinobacteria;D_5__hgcl clade;D_6__uncult. Clavibacter sp. (2.0 %)  | 0           | 0              | 0           | 0              | 0           | 0           | 0.17-0.20   | 0.17-0.20      | <0.01       | <0.01          | 0.03-0.07      | 0.02-0.03         |
| 10.Verrucomicrobia;D_5__Luteolibacter;__ (1.4 %)                        | <0.01       | <0.01-0.02     | <0.01       | <0.01          | <0.01       | <0.01       | <0.01       | 0              | <0.01       | <0.01          | <0.01          | <0.01             |
| 11. Proteobacteria;D_5__Aeromonas;__ (1.3 %)                            | <0.01       | <0.01          | <0.01-0.23  | 0.02-0.65      | 0           | <0.01       | <0.01       | <0.01          | <0.01-0.06  | <0.01-0.04     | <0.01          | <0.01             |
| 12. Actinobacteria;D_4__Sporichthyaceae;__;__ (1.2 %)                   | 0           | 0              | 0           | 0              | 0           | 0           | <0.01       | <0.01          | <0.01       | 0              | <0.01          | <0.01             |
| 13. Firmicutes;D_5__Bacillus;__ (1.1 %)                                 | <0.01       | <0.01          | <0.01-0.26  | <0.01-0.16     | <0.01       | <0.01-0.01  | <0.01       | 0              | <0.01       | 0-0.03         | <0.01-0.03     | 0.03-0.07         |
| 14. Proteobacteria;D_5__Acinetobacter;__ (1.1 %)                        | <0.01       | 0              | 0           | <0.01          | 0.01-0.4    | 0.02-0.20   | 0           | <0.01          | <0.01       | <0.01          | <0.01-0.06     | <0.01             |

| HL1_Top_Feb | HL1_Bottom_Feb | HL1_Top_May | HL1_Bottom_May | HL1_Top_August | HL1_Bottom_August | HL2_Top_Feb | HL2_Bottom_Feb | HL2_Top_May | HL2_Bottom_May | HL2_Top_August | HL2_Bottom_August | Legend     |
|-------------|----------------|-------------|----------------|----------------|-------------------|-------------|----------------|-------------|----------------|----------------|-------------------|------------|
| <0.01-0.23  | <0.01-0.01     | <0.01       | 0-0.02         | <0.01          | <0.01             | <0.01       | <0.01          | <0.01       | <0.01          | <0.01          | <0.01             | 0          |
| 0.04-0.11   | 0.09-0.20      | 0.24-0.32   | 0.12-0.26      | 0.10-0.16      | 0.05-0.07         | 0.05        | 0.03           | 0.12-0.17   | 0.15-0.45      | 0.03-0.04      | 0.05-0.06         | <0.01      |
| 0.08-0.32   | <0.01-0.23     | 0.05-0.08   | 0.01-0.04      | 0              | 0                 | 0.28-0.29   | 0.33           | <0.01       | <0.01          | 0              | 0                 | ≤0.01-0.25 |
| <0.01       | <0.01          | <0.01       | <0.01          | <0.01          | <0.01             | <0.01       | <0.01          | 0           | 0              | <0.01          | <0.01             | 0.26-0.50  |
| <0.01-0.04  | 0-0.02         | 0.02        | 0-0.02         | <0.01-0.01     | <0.01             | 0.11-0.13   | 0.12           | 0.19-0.20   | 0-0.18         | 0.09-0.11      | 0.07-0.15         | 0.6-0.75   |
| <0.01-0.02  | 0-0.01         | <0.01       | <0.01          | <0.01-0.02     | <0.01             | 0.09        | 0.12           | 0.19-0.24   | 0-0.25         | 0.12-0.20      | 0.14-0.17         | >0.76      |
| 0-0.10      | <0.01-0.05     | <0.01       | 0-0.03         | <0.01          | <0.01             | <0.01       | 0              | 0           | <0.01          | <0.01          | <0.01             |            |
| <0.01-0.03  | 0.02-0.08      | 0.02-0.03   | 0.02           | <0.01          | <0.01             | <0.01       | <0.01          | <0.01       | <0.01          | 0              | 0                 |            |
| <0.01-0.09  | <0.01-0.04     | <0.01-0.04  | 0.02-0.08      | 0.05-0.06      | 0.03-0.07         | 0           | 0              | <0.01       | <0.01          | <0.01          | <0.01             |            |
| <0.01       | 0              | 0           | 0              | <0.01          | <0.01             | <0.01       | <0.01          | 0.19-0.22   | 0.08-0.36      | <0.01          | 0.01-0.02         |            |
| <0.01       | <0.01-0.02     | <0.01       | <0.01          | <0.01          | <0.01             | <0.01       | <0.01          | <0.01       | <0.01          | <0.01          | <0.01-0.02        |            |
| <0.01       | <0.01          | <0.01-0.02  | 0.02           | 0.11-0.15      | 0.05-0.10         | 0           | 0              | <0.01       | 0.01-0.03      | 0.06-0.08      | 0.05-0.07         |            |
| <0.01-0.11  | <0.01-0.12     | <0.01       | <0.01          | <0.01          | <0.01             | <0.01       | <0.01          | 0           | <0.01          | 0              | 0                 |            |
| 0           | <0.01          | <0.01       | <0.01          | <0.01-0.10     | <0.01             | 0           | 0              | <0.01       | <0.01          | <0.01          | <0.01-0.03        |            |

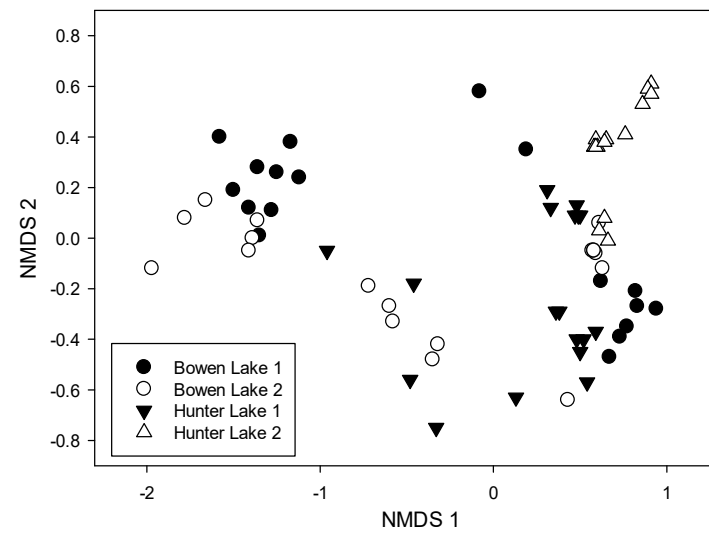

Supplementary Figure 1. Nonmetric multidimensional scaling (NMDS) ordination of pelagic microbe assemblages from pit lakes in the Bowen Basin, Queensland and Hunter Basin, New South Wales, Australia. Data shows an overlay of "lake" as indicated in figure legend.

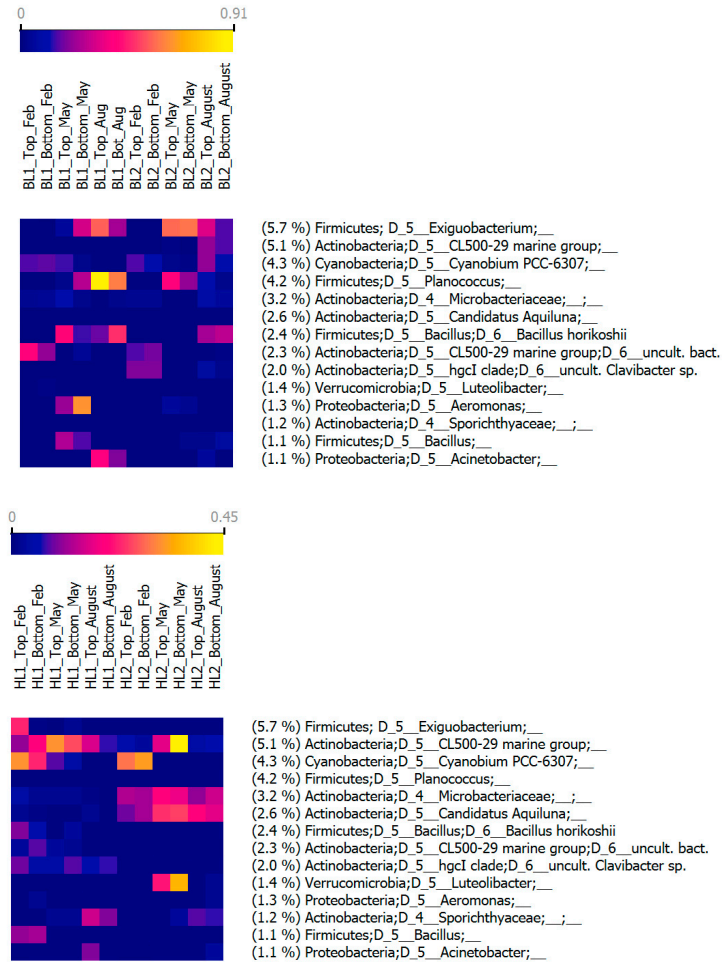

Supplementary Figure 2. Heat map of overall most relatively abundant microbes (> 1%) from pit lakes in the Bowen Basin, Queensland (top) and Hunter Basin, New South Wales (bottom), Australia. Heat map is composed of the same data as Figure 8 but divided here by catchment to facilitate understanding of temporal cycling of ‘core’ microbial taxa; *Exiguobacterium* (Firmicutes) vs. Actinobacteria and a Cyanobacterium.
